# Supplementary material for: Nutritional Composition and Health Benefits of Various Botanical Types of Melon (Cucumis melo L.)
Source: MDPI journal article supplement (doi:10.3390/plants10091755), 2021-08-24
Supplement: s1 [file s1]

Table-S1 Descriptive statistical analysis of nutritional value of melon samples

| Average value   | Use of melons<br>(Number of<br>samples) | Mean  | Std.<br>Deviation | Std.<br>Error | 95% Confidence Interval for Mean |             | Minimum | Maximum |
|-----------------|-----------------------------------------|-------|-------------------|---------------|----------------------------------|-------------|---------|---------|
|                 |                                         |       |                   |               | Lower Bound                      | Upper Bound |         |         |
| Ascorbic acid   | Fruit (18)                              | 33.79 | 1.65              | 0.39          | 32.97                            | 34.61       | 31.51   | 37.21   |
|                 | Vegetable(9)                            | 35.09 | 2.35              | 0.78          | 33.28                            | 36.90       | 31.90   | 38.59   |
|                 | Wild (3)                                | 37.05 | 2.42              | 1.40          | 31.04                            | 43.05       | 34.26   | 38.63   |
|                 | Total (30)                              | 34.50 | 2.15              | 0.39          | 33.70                            | 35.31       | 31.51   | 38.63   |
| Carotenoids     | Fruit(18)                               | 9.46  | 4.65              | 1.10          | 7.15                             | 11.78       | 3.41    | 21.67   |
|                 | Vegetable(9)                            | 9.44  | 6.03              | 2.01          | 4.80                             | 14.08       | 4.05    | 21.23   |
|                 | Wild(3)                                 | 5.25  | 1.82              | 1.05          | 0.72                             | 9.78        | 3.38    | 7.02    |
|                 | Total(30)                               | 9.03  | 4.96              | 0.91          | 7.18                             | 10.89       | 3.38    | 21.67   |
| Polyphenols     | Fruit(18)                               | 11.24 | 2.77              | 0.65          | 9.86                             | 12.62       | 5.99    | 16.25   |
|                 | Vegetable(9)                            | 11.95 | 5.85              | 1.95          | 7.45                             | 16.44       | 4.84    | 22.03   |
|                 | Wild(3)                                 | 16.27 | 4.20              | 2.42          | 5.84                             | 26.70       | 11.42   | 18.70   |
|                 | Total(30)                               | 11.96 | 4.17              | 0.76          | 10.40                            | 13.51       | 4.84    | 22.03   |
| Total Sugars    | Fruit(18)                               | 39.88 | 11.34             | 2.67          | 34.24                            | 45.52       | 25.40   | 61.40   |
|                 | Vegetable(9)                            | 42.39 | 11.08             | 3.69          | 33.88                            | 50.91       | 25.49   | 53.89   |
|                 | Wild(3)                                 | 29.45 | 4.41              | 2.54          | 18.50                            | 40.40       | 25.42   | 34.16   |
|                 | Total(30)                               | 39.59 | 11.12             | 2.03          | 35.44                            | 43.75       | 25.40   | 61.40   |
| Reducing Sugars | Fruit(18)                               | 1.74  | 0.69              | 0.16          | 1.39                             | 2.09        | 1.00    | 2.84    |
|                 | Vegetable(9)                            | 2.10  | 0.49              | 0.16          | 1.72                             | 2.47        | 1.19    | 2.81    |
|                 | Wild(3)                                 | 1.09  | 0.24              | 0.14          | 0.50                             | 1.69        | 0.82    | 1.28    |
|                 | Total(30)                               | 1.78  | 0.66              | 0.12          | 1.54                             | 2.03        | 0.82    | 2.84    |

Table-S2 Post Hoc analysis of variation using Kruskal Wallis H test

| Dependent Variable | Type of melon application | Veg/ Fruit | Std. Error | Sig.  | 95% Confidence Interval |             |
|--------------------|---------------------------|------------|------------|-------|-------------------------|-------------|
|                    |                           |            |            |       | Lower Bound             | Upper Bound |
| Ascorbic acid      | Fruit                     | Vegetable  | 0.79       | 0.11  | -2.93                   | 0.32        |
|                    |                           | Wild       | 1.21       | 0.01* | -5.74                   | -0.76       |
|                    | Vegetable                 | Fruit      | 0.79       | 0.11  | -0.32                   | 2.93        |
|                    |                           | Wild       | 1.29       | 0.14  | -4.61                   | 0.70        |
|                    | Wild                      | Fruit      | 1.21       | 0.01* | 0.76                    | 5.74        |
|                    |                           | Vegetable  | 1.29       | 0.14  | -0.70                   | 4.61        |
| Carotenoids        | Fruit                     | Vegetable  | 2.02       | 0.99  | -4.13                   | 4.18        |
|                    |                           | Wild       | 3.09       | 0.18  | -2.14                   | 10.56       |
|                    | Vegetable                 | Fruit      | 2.02       | 0.99  | -4.18                   | 4.13        |
|                    |                           | Wild       | 3.31       | 0.21  | -2.60                   | 10.97       |
|                    | Wild                      | Fruit      | 3.09       | 0.18  | -10.5                   | 2.14        |
|                    |                           | Vegetable  | 3.31       | 0.21  | -10.9                   | 2.60        |
| Polyphenols        | Fruit                     | Vegetable  | 1.64       | 0.67  | -4.08                   | 2.66        |
|                    |                           | Wild       | 2.51       | 0.05* | -10.1                   | 0.12        |
|                    | Vegetable                 | Fruit      | 1.64       | 0.67  | -2.66                   | 4.08        |
|                    |                           | Wild       | 2.68       | 0.12  | -9.83                   | 1.19        |
|                    | Wild                      | Fruit      | 2.51       | 0.05* | -0.12                   | 10.18       |
|                    |                           | Vegetable  | 2.68       | 0.12  | -1.19                   | 9.83        |
| Total Sugar        | Fruit                     | Vegetable  | 4.45       | 0.57  | -11.6                   | 6.62        |
|                    |                           | Wild       | 6.79       | 0.13  | -3.51                   | 24.37       |
|                    | Vegetable                 | Fruit      | 4.45       | 0.57  | -6.62                   | 11.64       |
|                    |                           | Wild       | 7.26       | 0.08  | -1.96                   | 27.85       |
|                    | Wild                      | Fruit      | 6.79       | 0.13  | -24.3                   | 3.51        |
|                    |                           | Vegetable  | 7.26       | 0.08  | -27.8                   | 1.96        |
| Reducing Sugars    | Fruit                     | Vegetable  | 0.25       | 0.16  | -0.87                   | 0.15        |
|                    |                           | Wild       | 0.38       | 0.10  | -0.14                   | 1.43        |
|                    | Vegetable                 | Fruit      | 0.25       | 0.16  | -0.15                   | 0.87        |
|                    |                           | Wild       | 0.41       | 0.02* | 0.16                    | 1.84        |
|                    | Wild                      | Fruit      | 0.38       | 0.10  | -1.43                   | 0.14        |
|                    |                           | Vegetable  | 0.41       | 0.02* | -1.84                   | -0.16       |

Note: The mean difference is significant at the 0.05 level.\* indicate values are significant for specific parameter compared to respective type.

Table-S3 Correlation between Content of nutrition and Biological activity of different melons analyzed.

| <b>Activity →</b>   | <b>DPPH assay</b> |           |            | <b>Nitric oxide inhibition (%)</b> |           |            |            | <b>ACE Inhibition</b> |
|---------------------|-------------------|-----------|------------|------------------------------------|-----------|------------|------------|-----------------------|
| <b>Conc. in ppm</b> | <b>25</b>         | <b>50</b> | <b>100</b> | <b>25</b>                          | <b>50</b> | <b>100</b> | <b>200</b> | <b>100</b>            |
| Ascorbic acid       | -0.14             | 0.03      | -0.02      | -0.24                              | -0.10     | -0.31      | -0.27      | -0.08                 |
| Carotenoids         | -0.22             | -0.10     | 0.03       | -0.06                              | 0.00      | -0.06      | 0.11       | 0.13                  |
| Polyphenols         | 0.50              | 0.67      | 0.56       | -0.18                              | -0.09     | -0.17      | -0.14      | -0.04                 |
